# Supplementary material for: Electrochemical sensing of dopamine at the surface of a dopamine grafted graphene oxide/poly(methylene blue) composite modified electrode
Source: Royal Society of Chemistry journal article supplement (doi:10.1039/c5ra25541d), 2016-01-01
Supplement: c5ra25541d1.pdf [file c5ra25541d1.pdf]

## Supporting Information

### Electrochemical Sensing of Dopamine at the Surface of Dopamine Grafted Graphene Oxide / Poly (Methylene Blue) Composite modified electrode

Demudu Babu Gorle and Manickam Anbu Kulandainathan\*

Electrochemical Process Engineering Division, CSIR-Central Electrochemical Research Institute,  
Karaikudi, India

\*Email: [manbu123@gmail.com](mailto:manbu123@gmail.com)

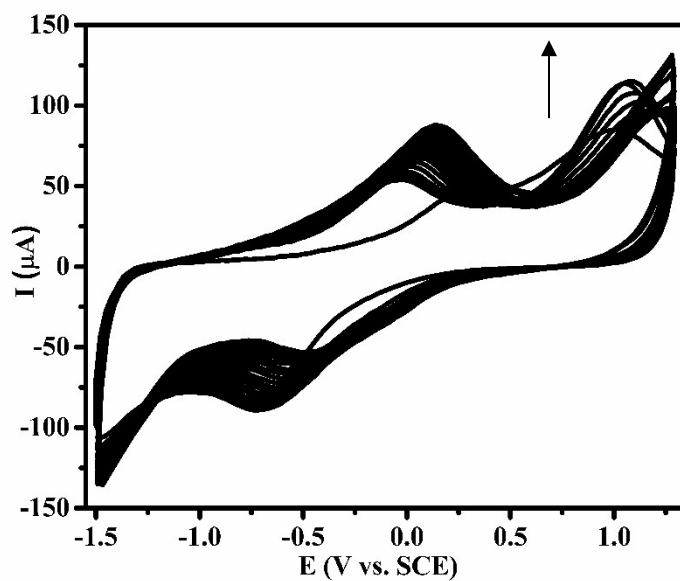

**Figure S1.** Electrochemical synthesis of ERG/PMB composite with 0.006 mM MB in pH 7.4 Buffer solution. Scan rate 50 mV s<sup>-1</sup>.

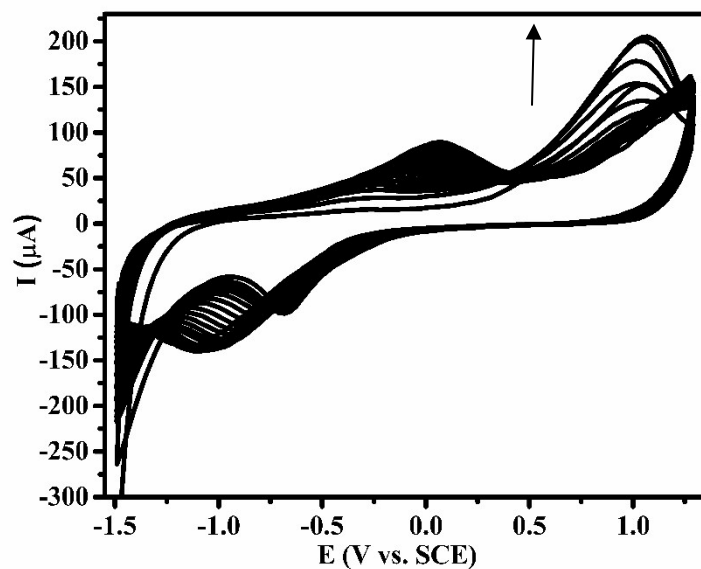

**Figure S2.** Electrochemical synthesis of ERG/PMB composite with 0.013 mM MB in pH 7.4 Buffer solution. Scan rate 50 mV s<sup>-1</sup>.

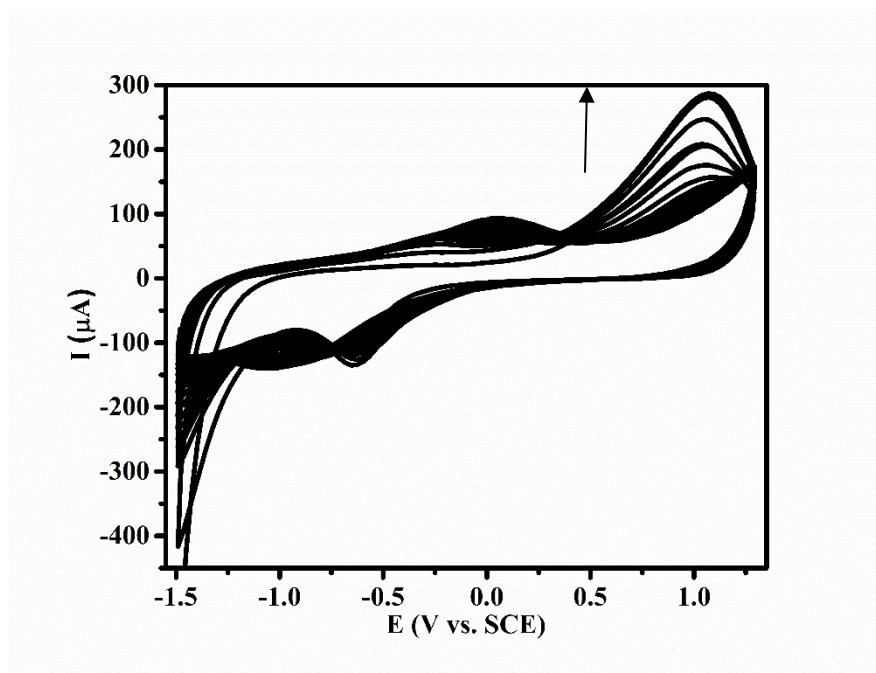

**Figure S3.** Electrochemical synthesis of ERG/PMB composite with 0.02 mM MB in pH 7.4 Buffer solution. Scan rate 50 mV s<sup>-1</sup>.

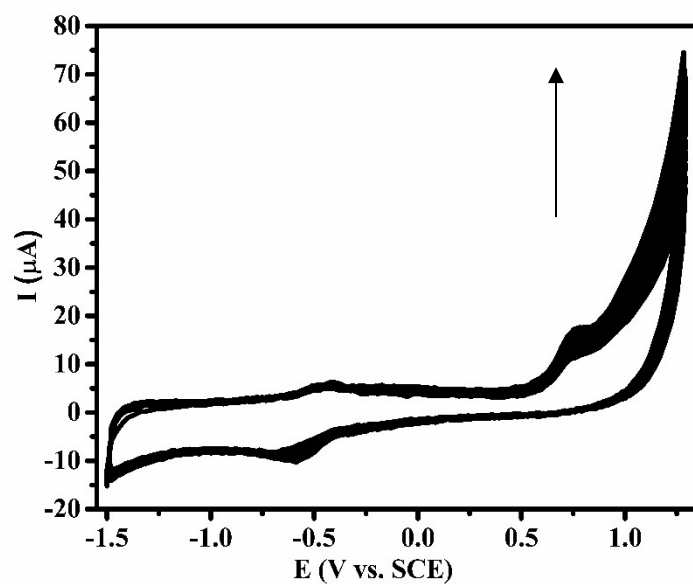

**Figure S4.** Electrochemical polymerization of Methylene Blue (MB) in pH 7.4 Buffer solution for 20 cycles. Scan rate  $50 \text{ mV s}^{-1}$ .

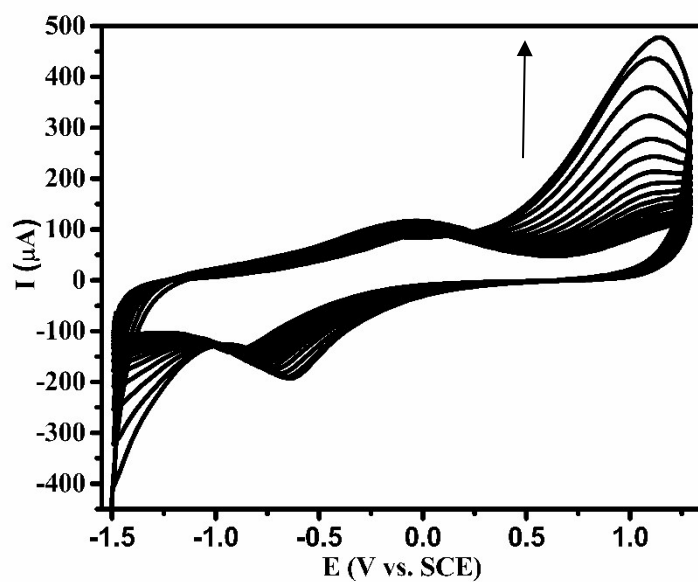

**Figure S5.** Electrochemical reduction of Graphene Oxide in pH 7.4 Buffer solution with continuous 20 cycles. Scan rate  $50 \text{ mV s}^{-1}$ .

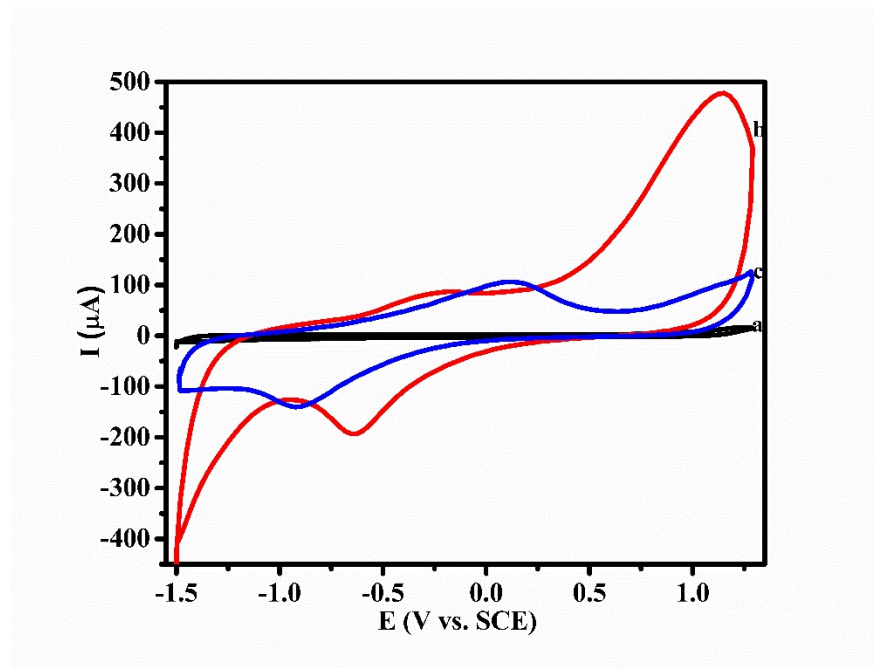

**Figure S6.** (a) GC, (b) GO and (c) ERG modified electrodes in pH 7.4 Buffer Solution. Scan rate 50  $mV s^{-1}$ .

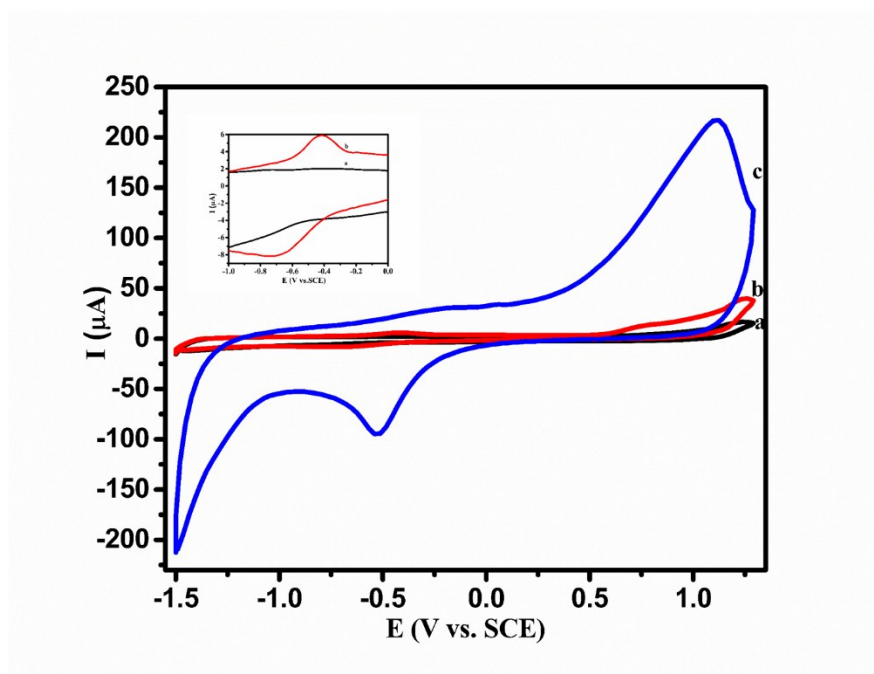

**Figure S7.** (a) GC without MB, (b) GC with MB and (c) GO/GC with MB. (Inset) GC (a) without MB, (b) with MB. Scan rate 50  $mV s^{-1}$ .

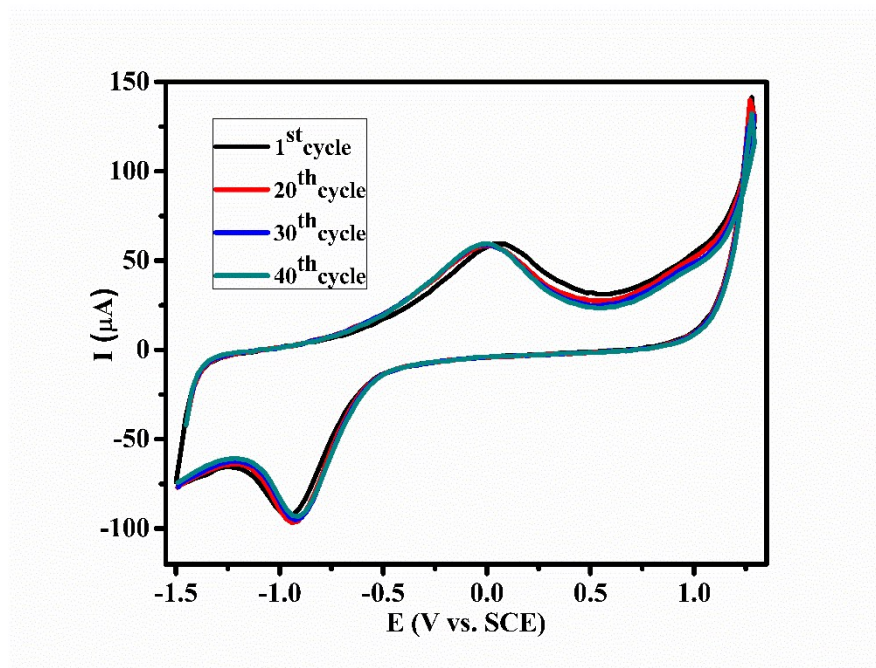

**Figure S8.** 1<sup>st</sup>, 20<sup>th</sup>, 30<sup>th</sup> and 40<sup>th</sup> cycles of ERG/PMB modified electrode in pH 7.4 buffer solution. Scan rate 50 mV s<sup>-1</sup>.

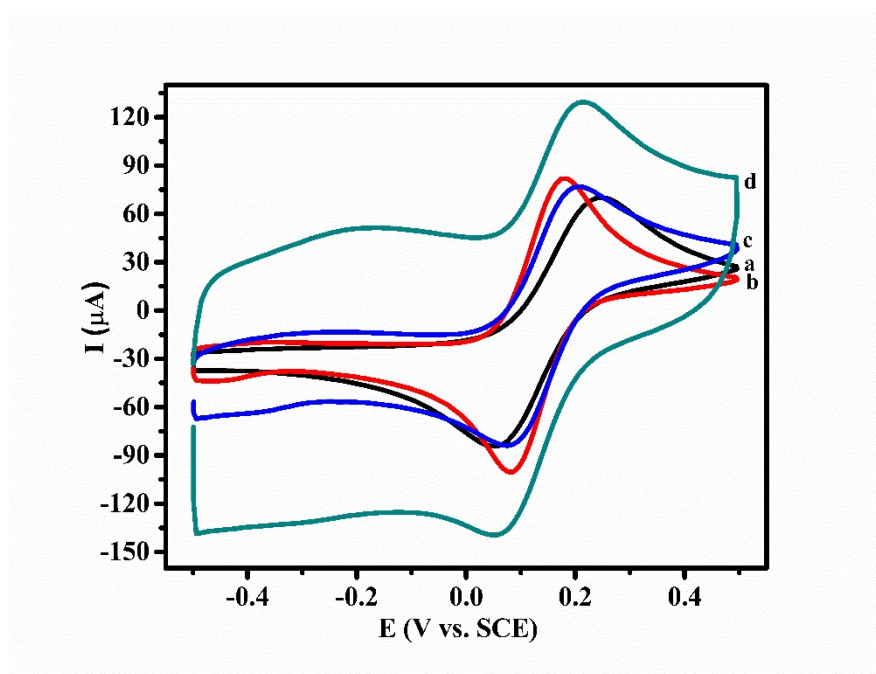

**Figure S9.** Cyclic Voltammograms of (a) GC, (b) PMB, (c) ERG and (d) ERG/PMB modified electrodes with 1 mM  $[\text{Fe}(\text{CN})_6]^{-3/-4}$  in 0.1 M KCl. Scan rate 50 mV s<sup>-1</sup>.

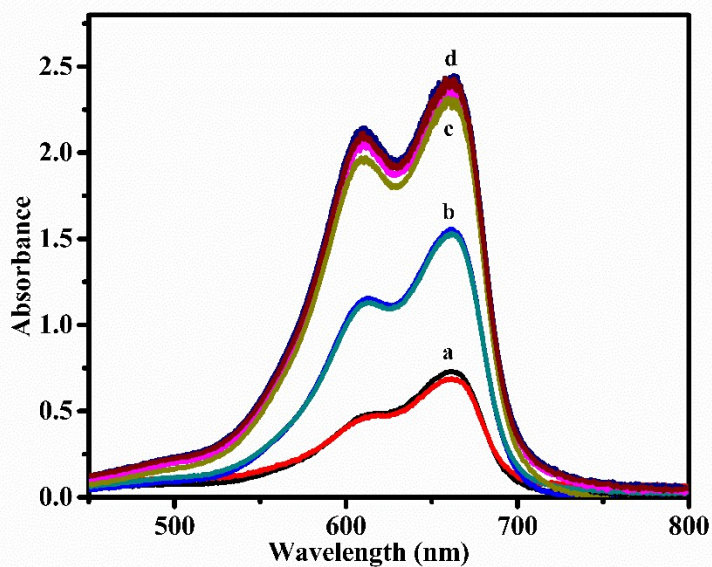

**Figure S10.** UV-Visible absorption spectrum of (a) 0.006 mM, (b) 0.013 mM, (c) 0.02 mM and (d) 0.026 mM MB before and after Cyclic Voltammetry.

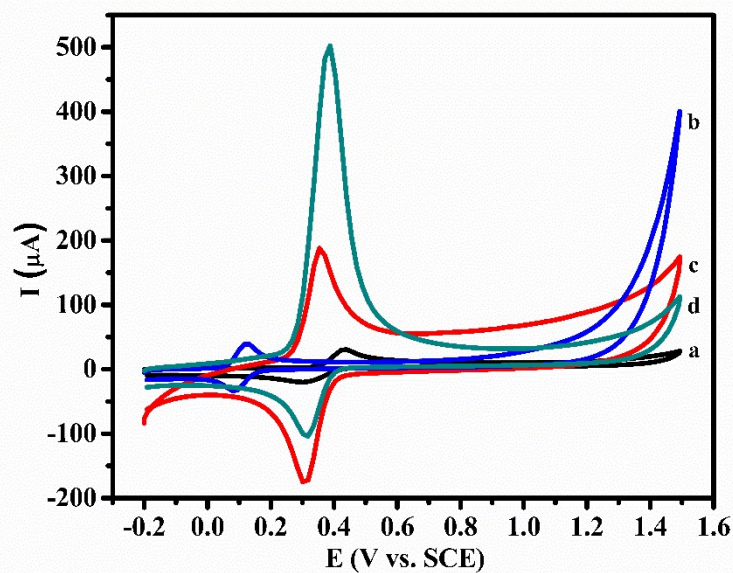

**Figure S11.** Cyclic Voltammograms of  $1 \times 10^{-3}$  mol L<sup>-1</sup> dopamine with (a) GC, (b) PMB, (c) ERG and (d) ERG/PMB modified electrodes in 0.1 M H<sub>2</sub>SO<sub>4</sub>. Scan rate 50 mV s<sup>-1</sup>.

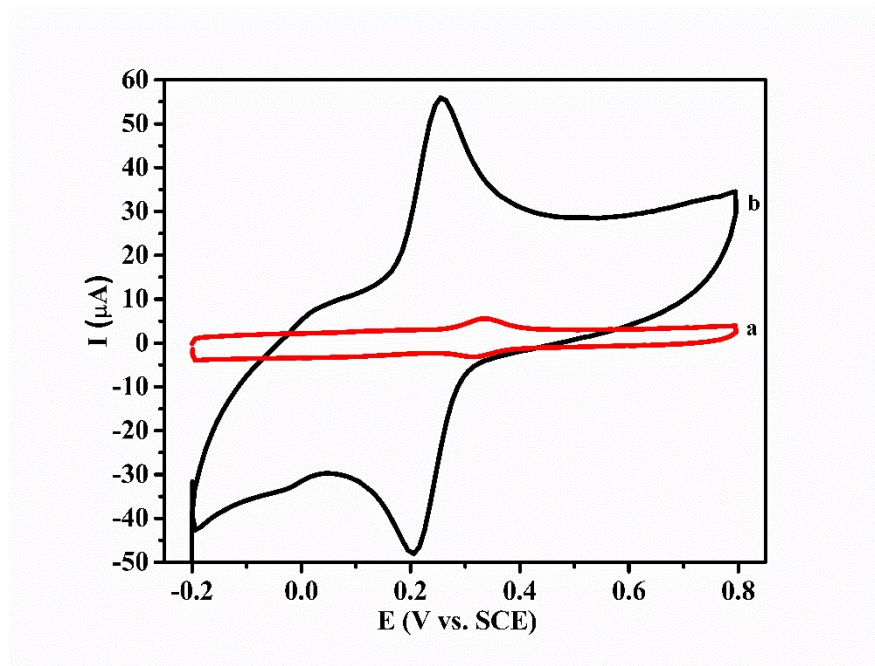

**Figure S12.** Cyclic Voltammograms of  $1 \times 10^{-3}$  mol L $^{-1}$  dopamine grafted (a) GC, (b) ERG/PMB modified electrodes in 0.1 M H $_2$ SO $_4$  after washing with water. Scan rate 50 mV s $^{-1}$ .

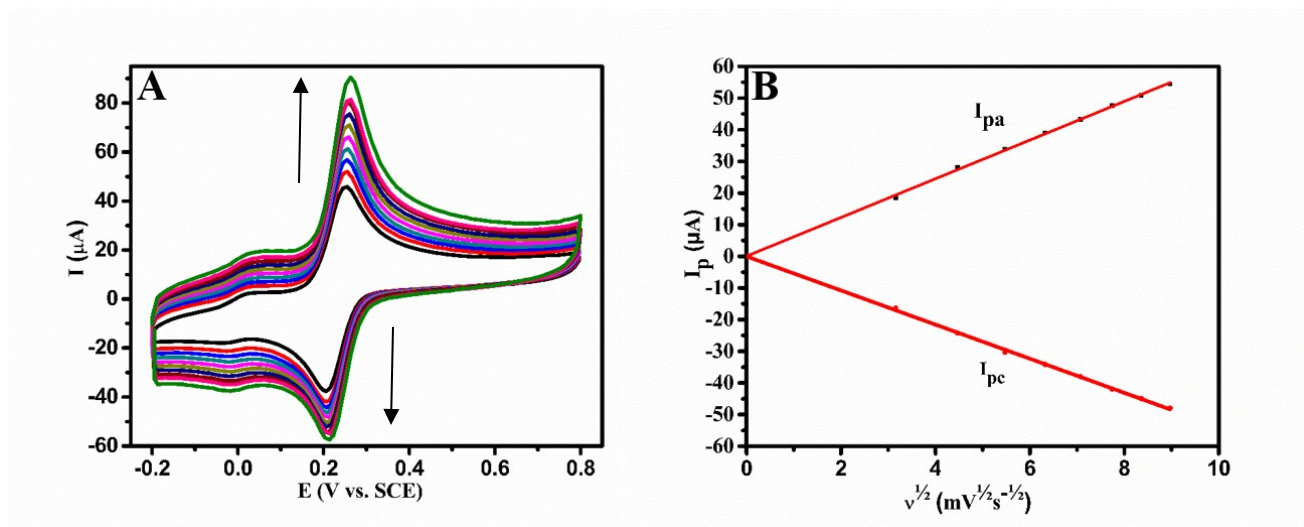

**Figure S13.** (A) Cyclicvoltammogram of dopamine grafted ERG/PMB modified electrode after washing with Scan rates from 50, 80, 100, 120, 140, 160, 180, 200 and 250 mV s $^{-1}$  and (B) peak current vs square root of scan rate.

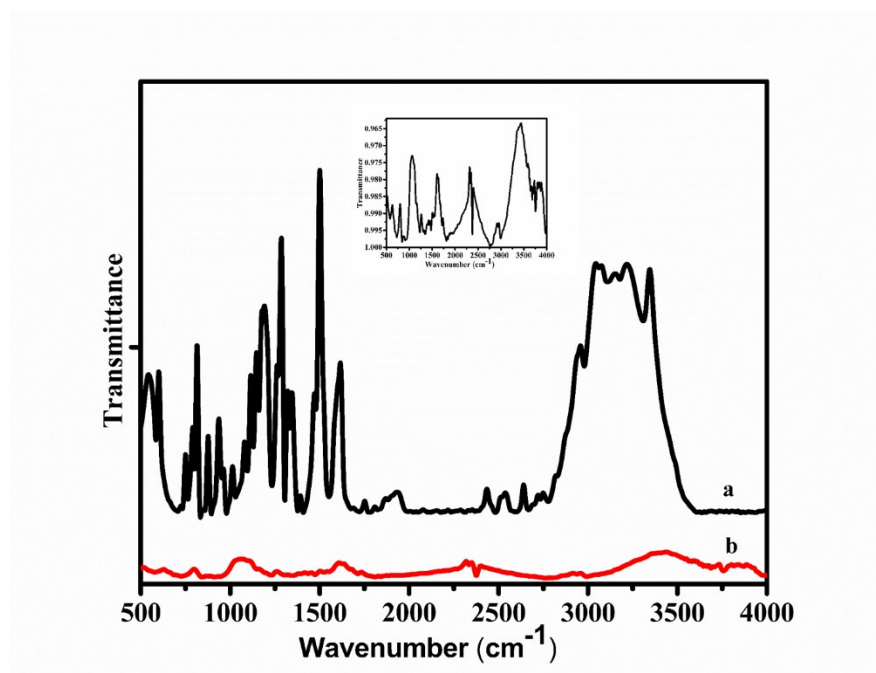

**Figure S14.** FT-IR Spectrum of (a) dopamine and (b) Oxidative Grafted dopamine on ERG/PMB modified electrode surface.

## SCHEME

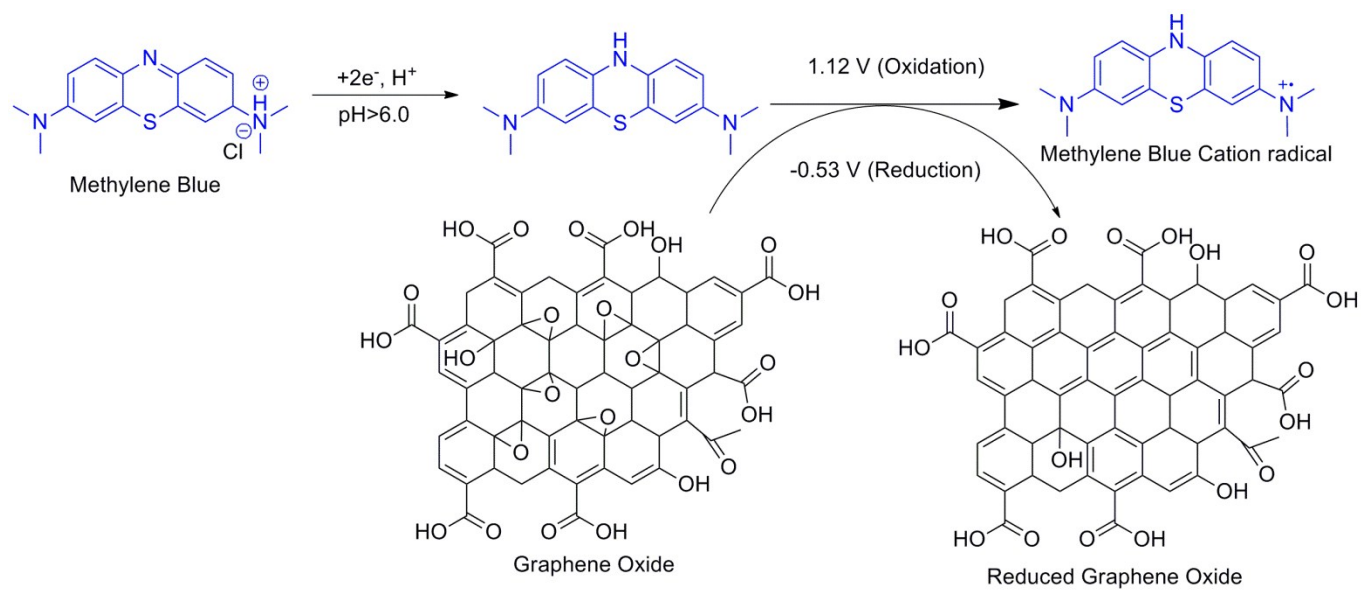

**Scheme S1.** Mechanism of ERG/PMB composite formation by Electrochemical Polymerization method.
